# Supplementary material
Source: Springer Nature journal article supplement (https://www.springermedizin.de/resource/supplementary/12877_2011_607_MOESM2_ESM.pdf/9439970)
Supplement: MOESM2 [file 9439970]

**3081 potentially relevant articles**

2721 articles excluded based on title because:

- Not meeting the inclusion criteria
- Duplicates

**360 potentially relevant articles**

296 articles excluded based on abstract because:

- No longitudinal study (57)
- Not community-dwelling (n=6)
- Aged younger than 65 years (n=36)
- No individual physical indicators (n=42)
- Outcome not ADL disability (n=116)
- Specific group of elderly (n=17)
- Duplicates (n=3)
- Other (n=19)

**64 potentially relevant articles**

42 articles excluded based on full-text because:

- Review (n=7)
- No longitudinal study (n=3)
- Not community-dwelling (n=6)
- Aged younger than 65 years (n=6)
- No individual physical indicators (n=3)
- Outcome not ADL disability (n=11)
- Specific group of elderly (n=2)
- Letter to editor (n=2)
- No full text available (n=2)

**22 relevant articles**

6 articles added from reference lists of retrieved reviews and included articles

**28 articles included in review**
